# Supplementary material
Source: MDPI journal article supplement (https://www.mdpi.com/2313-0105/9/5/273)
Supplement: s1 [file s1]

## Supplementary Materials

# **Controlling the molar ratios of cation to anion of precursors for high performance capacitive properties of MnO<sub>2</sub> hybridized carbon-based materials electrode**

**Wein-Duo Yang \*, Yi-Rong Chou, Cheng-Ching Kuo and Yu-Min Kang**

Department of Chemical and Materials Engineering, College of Engineering, National Kaohsiung University of Science and Technology, Sanmin District, Kaohsiung City 807618, Taiwan; mygirl850629@gmail.com (Y.-R.C.); jj25288487@gmail.com (C.-C.K.); f110146142@nkust.edu.tw (Y.-M.K.)

\* Correspondence: ywd@nkust.edu.tw; Tel.: +886-7-3814526 (ext. 15116)

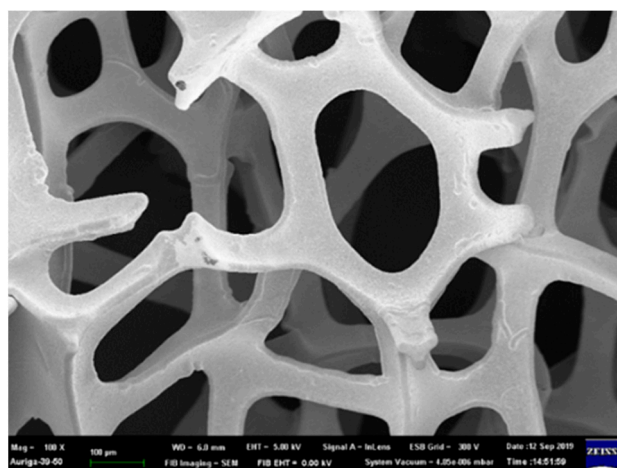

**Figure S1.** SEM image of bare nickel foam.

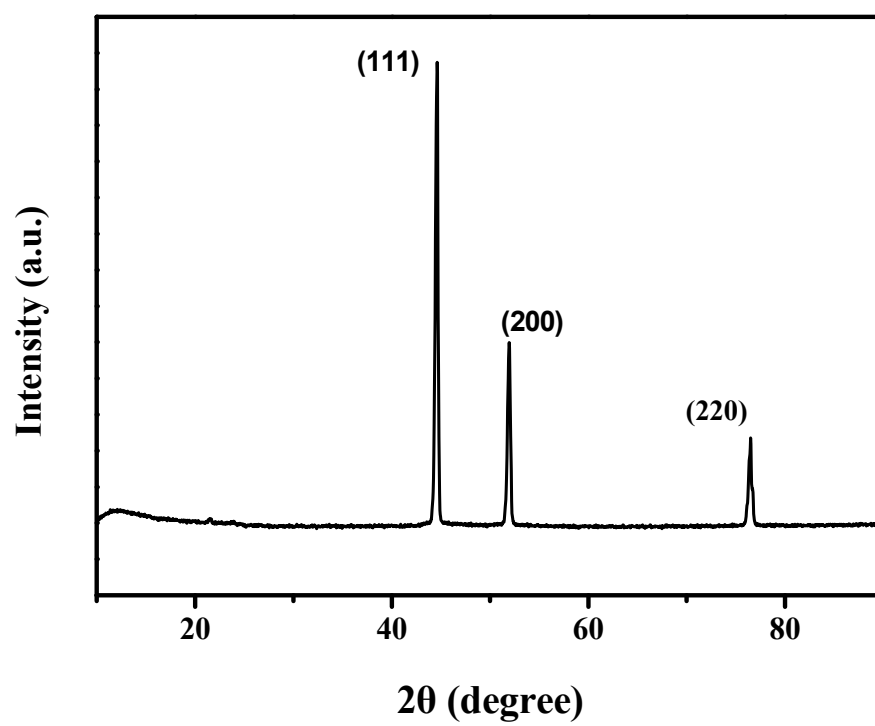

**Figure S2** The XRD patterns of bare NF.

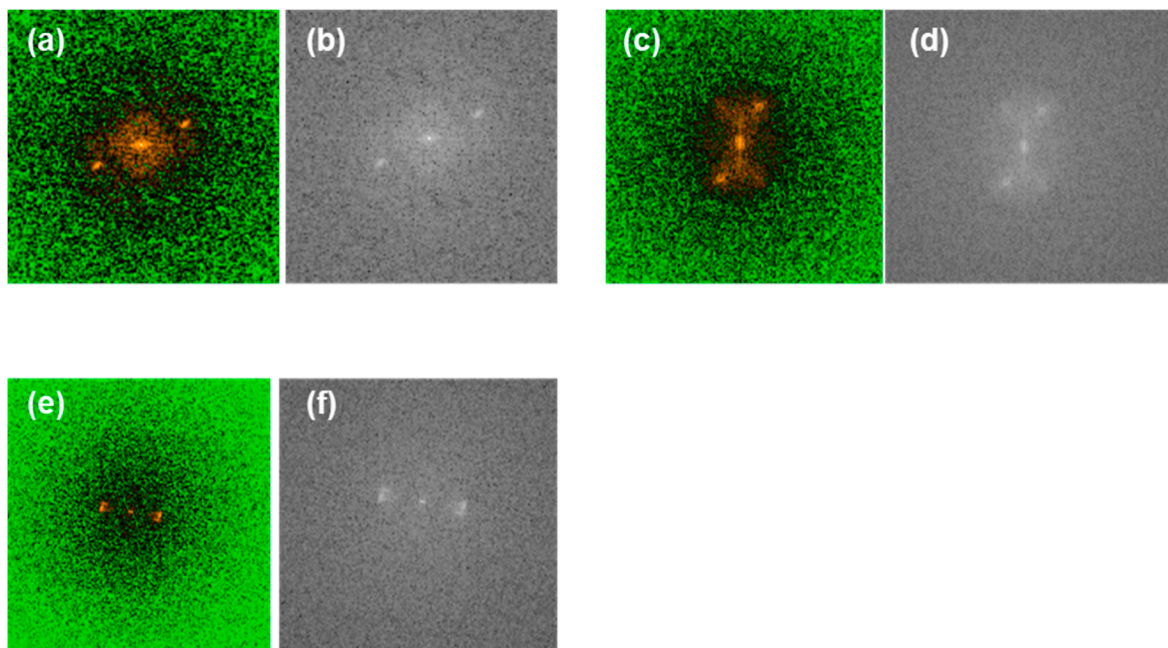

**Figure S3.** The FFT information of lattice spacing on HRTEM image. (a, b)  $\text{MnO}_2$ , (c, d) rGO, and (e, f) MWCNT.

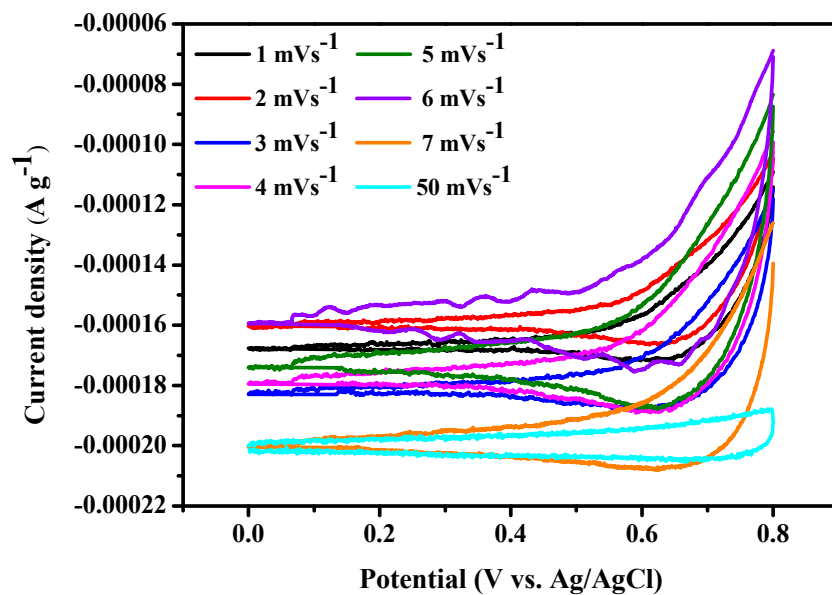

**Figure S4.** The low scan rate of CV curve for the bare NF substrate.
